# Supplementary material
Source: Springer Nature journal article supplement (https://www.springermedizin.de/resource/supplementary/12948_2005_16_MOESM3_ESM.pdf/9557028)

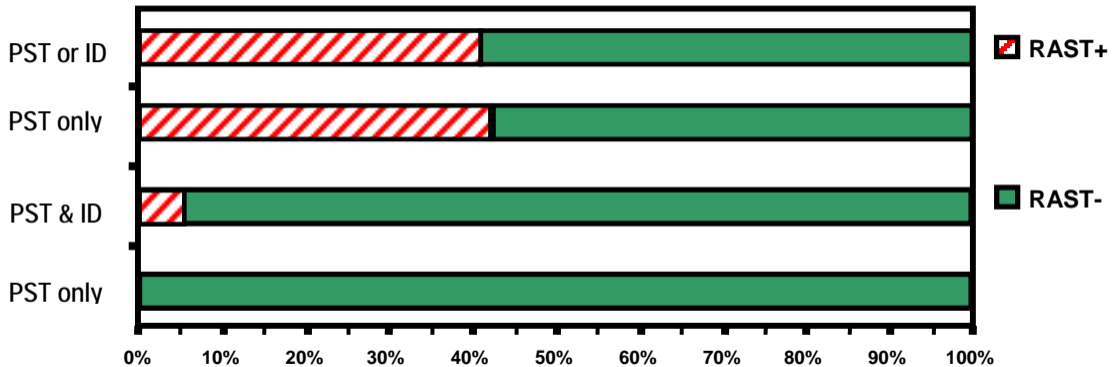

Supplement: MOESM3 [file 9557028]
